# Supplementary material for: Preclinical Characterisation of PSMA/GRPR-Targeting Heterodimer [68Ga]Ga-BQ7812 for PET Diagnostic Imaging of Prostate Cancer: A Step towards Clinical Translation
Source: MDPI journal article supplement (doi:10.3390/cancers15020442), 2023-01-10
Supplement: s1 [file s1]

Supplementary material

# Preclinical Characterisation of PSMA/GRPR-targeting Heterodimer [<sup>68</sup>Ga]Ga-BQ7812 for PET Diagnostic Imaging of Prostate Cancer: a Step towards Clinical Translation

Fanny Lundmark <sup>1</sup>, Ayman Abouzayed <sup>1</sup>, Sara S. Rinne <sup>1</sup>, Vasiliy Timofeev <sup>2</sup>, Nadezhda Sipkina <sup>2</sup>, Maria Naan <sup>2</sup>, Anastasia Kirichenko <sup>3</sup>, Maria Vasyutina <sup>3</sup>, Daria Ryzhkova <sup>4</sup>, Ulrika Rosenström <sup>1</sup> and Anna Orlova <sup>1,5,\*</sup>

<sup>1</sup> Department of Medicinal Chemistry, Uppsala University, 751 23 Uppsala, Sweden

<sup>2</sup> Personalized Medicine Centre, Almazov National Medical Research Centre, 2 Akkuratova Str., 197341 Saint Petersburg, Russia

<sup>3</sup> Preclinical and Translational Research Centre, Almazov National Medical Research Centre, 2 Akkuratova Str., 197341 Saint Petersburg, Russia

<sup>4</sup> Department of Nuclear Medicine and Radiation Technology with Clinic, Almazov National Medical Research Centre, 2 Akkuratova Str., 197341 Saint Petersburg, Russia

<sup>5</sup> Science for Life Laboratory, Department of Medicinal Chemistry, Uppsala University, 751 23 Uppsala, Sweden

\* Correspondence: [anna.orlova@ilk.uu.se](mailto:anna.orlova@ilk.uu.se)

## General information

### *Instruments and Equipment*

Analytical high performance liquid chromatography (HPLC) was performed on a Dionex UltiMate 3000 HPLC system with a Bruker amazon SL ion trap mass spectrometer and detection by UV (diode array detector, 214, 254, and 280 nm) and electrospray ionization (ESI) MS using a Penomenex Kinetex C18 column (50 × 3.0 mm, 2.6 µm particle size, 100 Å pore size) with gradients of H<sub>2</sub>O/CH<sub>3</sub>CN/0.05% HCOOH as mobile phase at a flow rate of 1.5 mL/min. Preparative reversed phase high-performance liquid chromatography (RP-HPLC) was performed by UV-triggered (254 nm) fraction collection with a Glison HPLC system using a Machery-nagel NUCLEODUR C18 HTec column (21 × 125 mm, particle size 5 µm) and H<sub>2</sub>O/CH<sub>3</sub>CN/0.1% TFA as mobile phase at a flow rate of 10 mL/min. <sup>68</sup>Ge/Ga-generator (Cyclotron Co., Obninsk, Russia) using 0.1 M metal-free hydrochloric acid was used to elute gallium-68. Radioactivity content was measured using an automated gamma counter (3-inch NaI(Tl) detector, 2480 Wizard2, PerkinElmer). nanoPET imaging of PC3-pip xenografted mice using a nanoScan PET/MR1 3T camera (Mediso Medical Imaging System Ltd., Budapest, Hungary) and CT scan was performed using a nanoScan SPECT/CT camera (Mediso Medical Imaging System Ltd., Budapest, Hungary). Reconstruction of the PET/CT scans was done using Nucline nanoScan 3.04.014.0000 software. The absorbed doses in the dosimetry investigation were estimated using OLINDA/EXM 1.0. Statistical analysis was performed by one-way ANOVA with Bonferroni's test corrected for multiple comparisons using GraphPad Prism 8 for Windows (GraphPad Software Inc, San Diego, CA, USA), p-values <0.05 were considered statistical significant.

### *Chemicals and Solvents*

Starting materials and solvents were purchased from Sigma Aldrich, Fisher Scientific, and Honeywell, and used without further purification if nothing else stated. NOTA-bis(tBu)-ester was purchased from CheMatech, France; Fmoc Rink Amide MBHA resin (loading 0.69 mmol/g) and L-Glu(OBn)-O(tBu) were purchased from Iris Biotech GmbH (Marktredwitz, Germany).

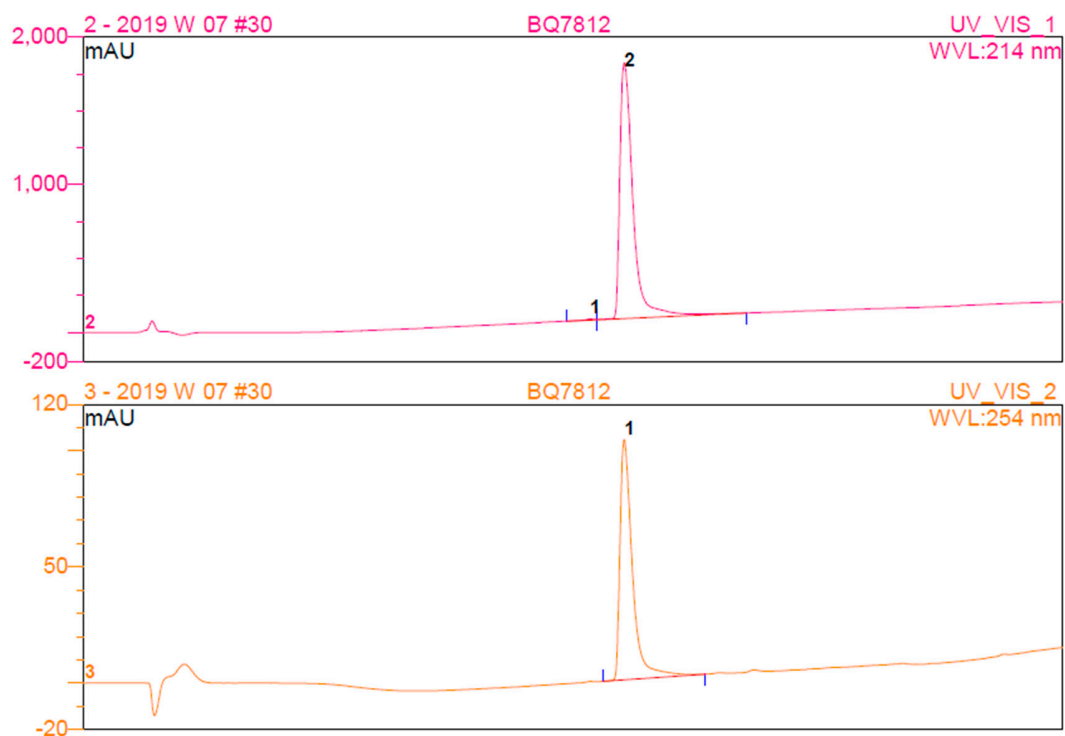

**Figure S1.** Analytical HPLC chromatogram of BQ7812. UV-detection at 214 and 254 nm.

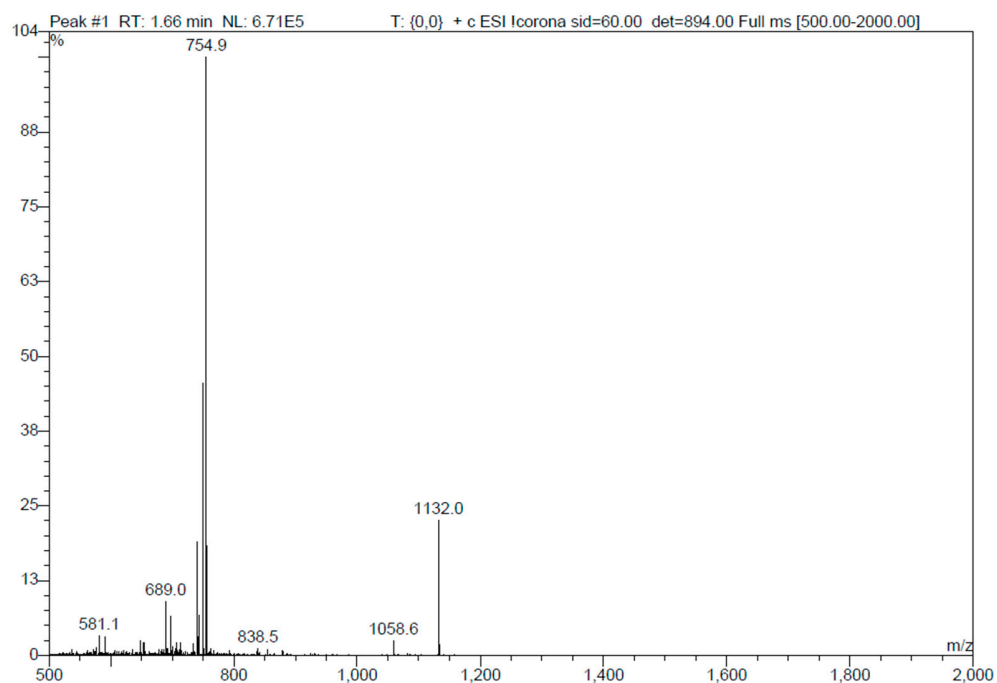

**Figure S2.** MS-chromatogram of BQ7812 with observed  $[M+2H]^{2+} = 1132.0$  and  $[M+3H]^{3+} = 754.9$ .

**Table S1.** Ex vivo biodistribution of [<sup>68</sup>Ga]Ga-BQ7812 (40 pmol/animal, 30 kBq) in BALB/c nu/nu PC3-pip xenografted tumour bearing mice at 1 and 3 h pi. Data are presented as average ± standard deviation. To the left; Uptake of activity was calculated as percent injected dose per tissue weight (% ID/g), To the right; tumour-to-organ ratios. Statistical analysis was done using one-way ANOVA with Bonferroni's test corrected for multiple comparisons.

|                         | Uptake of [ <sup>68</sup> Ga]Ga-BQ7812 (%IA/g) |                          |                           |                           | Tumour-to-organ ratio (T/O) |                          |
|-------------------------|------------------------------------------------|--------------------------|---------------------------|---------------------------|-----------------------------|--------------------------|
|                         | 1 h pi                                         |                          |                           | 3 h pi                    | 1 h pi                      | 3 h pi                   |
|                         | Non-blocked                                    | GRPR blocked             | PSMA blocked              | Non-blocked               | Non-blocked                 | Non-blocked              |
| <b>Blood</b>            | 0.86 ± 0.16                                    | 0.69 ± 0.28              | 0.80 ± 0.24               | 0.16 ± 0.02 <sup>c</sup>  | 13 ± 3                      | 35 ± 4 <sup>c</sup>      |
| <b>Salivary Glands</b>  | 0.44 ± 0.07                                    | 0.29 ± 0.07 <sup>a</sup> | 0.38 ± 0.12               | 0.14 ± 0.03 <sup>c</sup>  | 24 ± 3                      | 40 ± 8 <sup>c</sup>      |
| <b>Lungs</b>            | 0.86 ± 0.15                                    | -----                    | -----                     | 0.20 ± 0.05 <sup>c</sup>  | 12 ± 3                      | 29 ± 5 <sup>c</sup>      |
| <b>Liver</b>            | 0.89 ± 0.10                                    | -----                    | -----                     | 0.57 ± 0.03 <sup>c</sup>  | 11.8 ± 1.0                  | 9.9 ± 0.8                |
| <b>Spleen</b>           | 0.92 ± 0.16                                    | -----                    | -----                     | 0.33 ± 0.03 <sup>c</sup>  | 12 ± 3                      | 18 ± 3                   |
| <b>Pancreas</b>         | 5.63 ± 0.58                                    | 0.76 ± 0.14 <sup>a</sup> | 6.33 ± 1.86               | 0.60 ± 0.16 <sup>c</sup>  | 1.9 ± 0.2                   | 10 ± 4 <sup>c</sup>      |
| <b>Small Intestine</b>  | 1.33 ± 0.31                                    | -----                    | -----                     | 0.20 ± 0.02 <sup>c</sup>  | 8 ± 2                       | 28 ± 4 <sup>c</sup>      |
| <b>Kidneys</b>          | 45.26 ± 16.55                                  | 34.50 ± 8.74             | 13.78 ± 0.45 <sup>b</sup> | 10.55 ± 2.13 <sup>c</sup> | 0.3 ± 0.1                   | 0.53 ± 0.07 <sup>c</sup> |
| <b>Tumour (PC3-pip)</b> | 10.44 ± 0.97                                   | 5.73 ± 0.72 <sup>a</sup> | 8.26 ± 1.03 <sup>b</sup>  | 5.68 ± 0.62 <sup>c</sup>  | -----                       | -----                    |
| <b>Muscle</b>           | 0.21 ± 0.04                                    | -----                    | -----                     | 0.05 ± 0.01 <sup>c</sup>  | 52 ± 12                     | 116 ± 22 <sup>c</sup>    |
| <b>Bone</b>             | 0.31 ± 0.06                                    | -----                    | -----                     | 0.13 ± 0.03 <sup>c</sup>  | 35 ± 8                      | 47 ± 13                  |

*a* Value in GRPR-blocked group is significantly different than in Non-blocked group;

*b* Value in PSMA-blocked group is significantly different than in Non-blocked group;

*c* Value in Non-blocked group 3 h pi is significantly different than in Non-blocked group 1 h pi.
